# Supplementary material for: LS³: A Method for Improving Phylogenomic Inferences When Evolutionary Rates Are Heterogeneous among Taxa
Source: PubMed Central journal article supplement — Mol Biol Evol. 2016 Feb 23;33(6):1625–34. doi: 10.1093/molbev/msw043 (PMC4868118; doi:10.1093/molbev/msw043), 2016-02-23

## Supplementary Materials

### **LS<sup>3</sup>: A method for improving phylogenomic inferences when evolutionary rates are heterogeneous among taxa**

Carlos J. Rivera-Rivera<sup>1,2</sup> and Juan I. Montoya-Burgos<sup>1,2</sup>

<sup>1</sup>*Department of Genetics and Evolution, University of Geneva, 30 quai Ernest Ansermet, 1211 Geneva 4, Switzerland*

<sup>2</sup>*Institute of Genetics and Genomics in Geneva, University of Geneva Medical Center, 1 rue Michel-Servet, 1211 Geneva 4, Switzerland*

#### **This file includes:**

##### 1. Supplementary Figures:

- Figure S1 – Input topologies for producing the simulated evolution dataset followed a common backbone and 50 different arrangements of long branches in the fast-evolving lineage
- Figure S2 – LBA artifact in the positioning of Glires in the mammalian tree and its resolution upon removing LS<sup>3</sup>-flagged sequences and genes

# 1. Supplementary Material Figures

## Figure S1. Input topologies for producing the simulated evolution dataset followed a common backbone and 50 different arrangements of long branches in the fast-evolving lineage.

Examples of the different long-branch arrangements assigned to the taxa of Lineage C for producing the simulated data of this study. The final dataset is composed of 200 simulated gene alignments of 2,000 bp for each of the 50 cases of long branches (15 cases with two long branches, 20 cases with three long branches, and 15 cases with four long branches) for a total of 10,000.

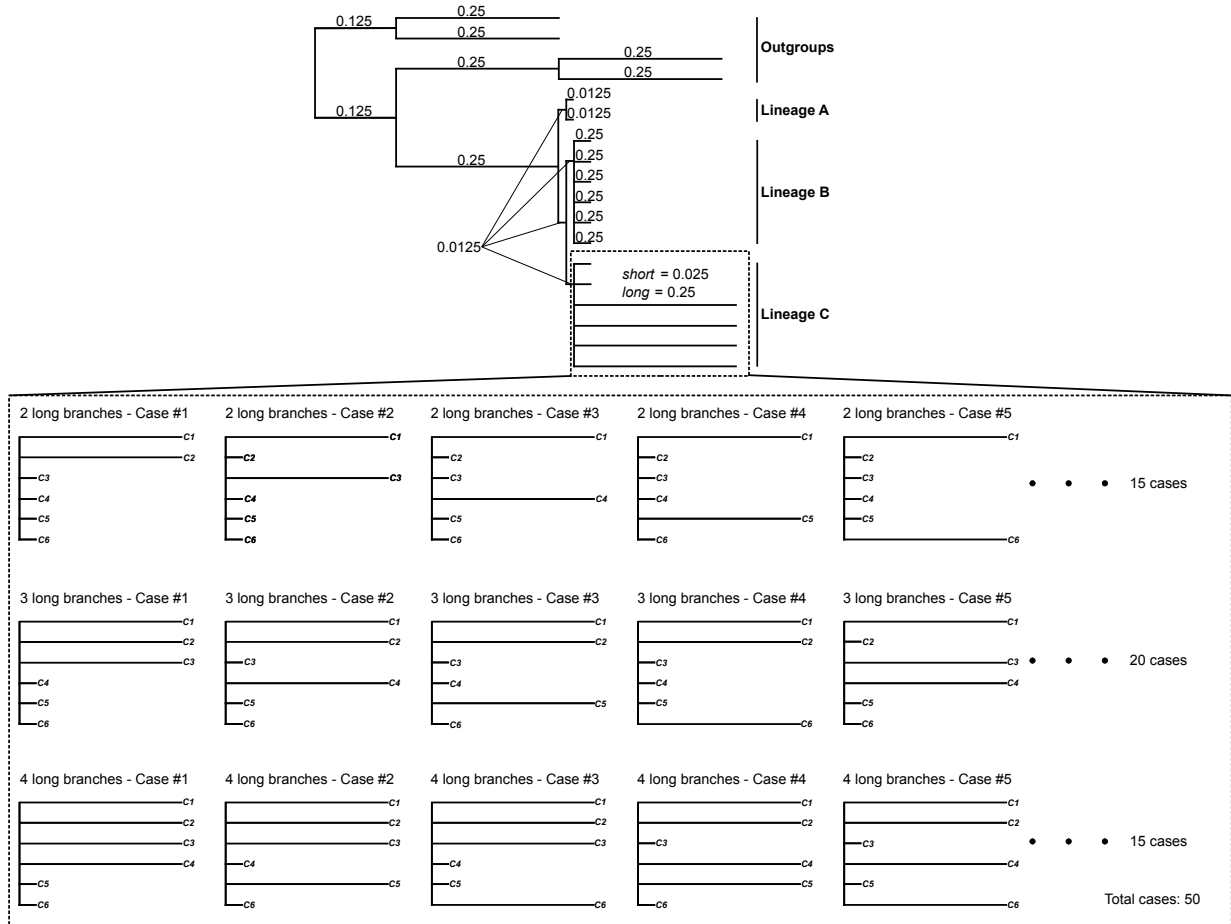

**Figure S2. LBA artifact in the positioning of Glires in the mammalian tree and its resolution upon removing LS<sup>3</sup>-flagged sequences and genes.**

A dataset of 57 genes leading to the non-monophyly and missplacement of Glires within the mammalian tree due to LBA was assembled, named the “only LBA” (OL) dataset. This dataset was used to assess the efficiency of the LS<sup>3</sup> method in flagging data that could reinforce LBA artifacts. (A) Maximum Likelihood phylogeny obtained with the OL dataset showing the non-monophyly and missplacement of Glires (in red) relative to the Laurasiatheria (in blue) and the Primates (in yellow). Note the strong bootstrap support for the wrong grouping of Laurasiatheria with Primates. (B) ML phylogeny obtained after removing sequences and genes that LS<sup>3</sup> flagged in the OL dataset (OL<sub>LS<sup>3</sup></sub>) showing the correct monophyly of Glires and their sister group relationship with Primates, yet with poor bootstrap support. (C) ML phylogeny obtained after adding to the OL dataset two genes that produced the correct species tree, the OL+2 dataset; the bootstrap support for the wrong relationships are reduced, but the topology is incorrect. (D) The ML phylogeny obtained with the OL<sub>LS<sup>3</sup></sub>+2 dataset, in which the LS<sup>3</sup>-flagged data has been removed, resulted in a correct phylogeny with strong bootstrap supports. Only bootstrap support values lower than 100 are shown.

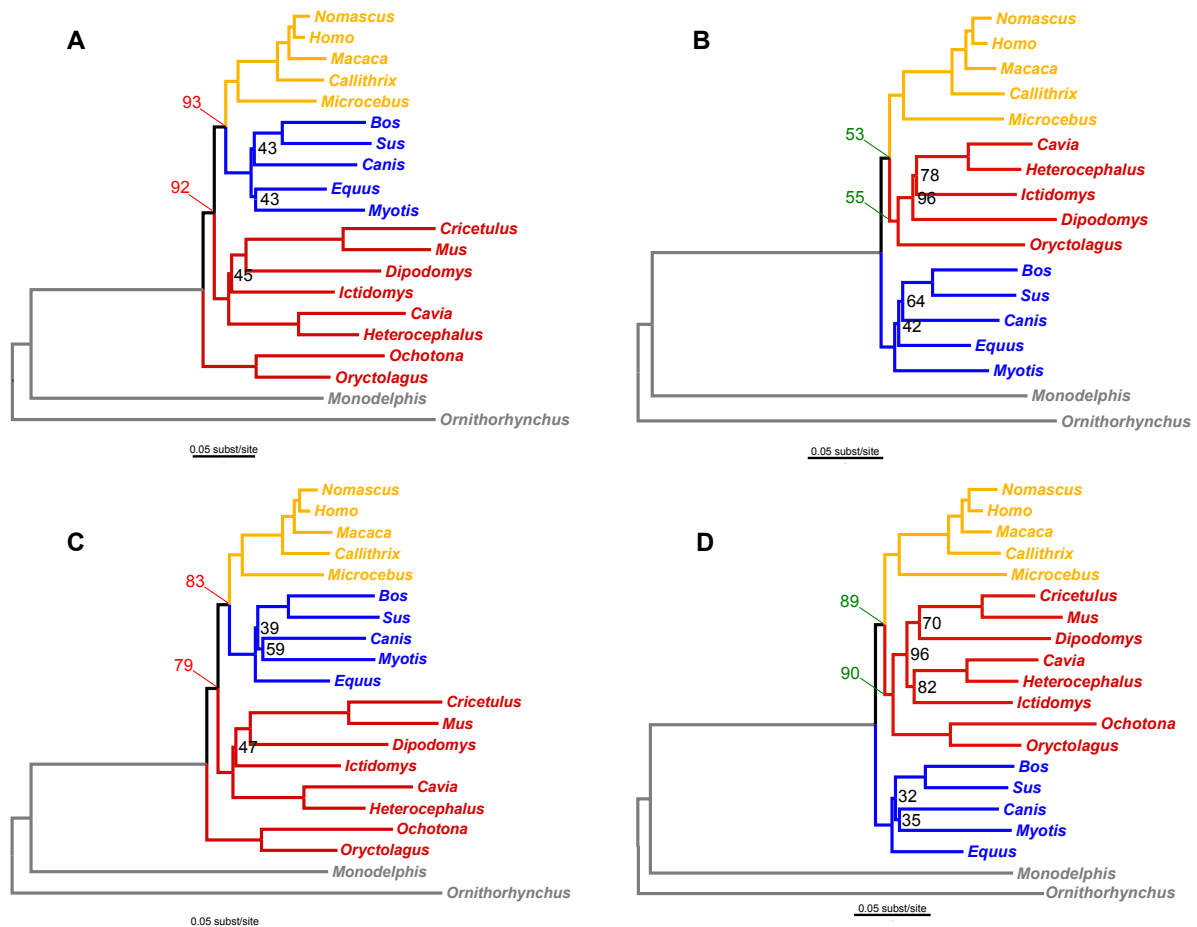

Supplement: supp_msw043_Supp_data_pdf.pdf [file supp_msw043_Supp_data_pdf.pdf]
